# Supplementary material for: Association of domain-specific physical activity and cardiorespiratory fitness with all-cause and cause-specific mortality in two population-based cohort studies
Source: PubMed Central journal article supplement (PMC6207740; doi:10.1038/s41598-018-34468-7), 2018-10-30
Supplement: 41598_2018_34468_MOESM1_ESM.pdf [file 41598_2018_34468_MOESM1_ESM.pdf]

Suppl. information for

Title: Association of domain-specific physical activity and cardiorespiratory fitness with all-cause and cause-specific mortality in two population-based cohort studies

Authors: Martin Bahls, Ph.D. <sup>\*1,2</sup>, Stefan Groß, Ph.D. <sup>1,2</sup>, Sebastian E. Baumeister, Ph.D. <sup>3</sup>, Henry Völzke, M.D. <sup>2,4</sup>, Sven Gläser, M.D. <sup>5</sup>, Ralf Ewert, M.D. <sup>1,2</sup>, Marcello R.P. Markus, M.D. <sup>1,2</sup>, Daniel Medenwald, M.D. <sup>6</sup>, Alexander Kluttig, Ph.D. <sup>6</sup>, Stephan B. Felix, M.D. <sup>1,2</sup>, Marcus Dörr, M.D. <sup>1,2</sup>

Suppl. Table 1 - Population descriptives of the SHIP study participants who died of CVD. All values are given as median (25<sup>th</sup> and 75<sup>th</sup> percentile) or percentage for categorical variables. BMI: body mass index. VO<sub>2</sub>peak: peak oxygen consumption. VO<sub>2</sub>@AT: oxygen consumption at the aerobic threshold. LTPA: leisure time physical activity. SPA: sports-related physical activity. WPA: work-related physical activity.

| Parameter                     | Survivors only<br>(n = 2769) | CVD mortality subgroup<br>(n = 113) | All subjects<br>(n = 2882) |
|-------------------------------|------------------------------|-------------------------------------|----------------------------|
| Age (years)                   | 52 (40; 64)                  | 75 (69; 81)                         | 53 (41; 65)                |
| Income (€)                    | 1100 (778; 1525)             | 1100 (779; 1450)                    | 1100 (778; 1525)           |
| alcohol consumption (ml/day)  | 3.9 (1.14; 12.13)            | 1.31 (0; 10.29)                     | 3.93 (1.01 (12.12)         |
| School education, % <10 years | 35.5                         | 80.0                                | 37.2                       |
| BMI (kg/m <sup>2</sup> )      | 27 (24; 31)                  | 29 (27; 33)                         | 27 (24; 31)                |
| VO <sub>2</sub> peak (ml/min) | 1900 (1534; 2383)            | 1385 (1010; 1713)                   | 1884 (1524; 2378)          |
| VO <sub>2</sub> @AT (ml/min)  | 1050 (900; 1300)             | 950 (750; 1200)                     | 1050 (900; 1300)           |
| max. Watt                     | 148 (116; 180)               | 100 (68; 116)                       | 148 (116; 180)             |
| LTPA                          | 3.25 (2.75; 3.75)            | 3 (2.5; 3.5)                        | 3.25 (2.75; 3.75)          |
| SPA                           | 2.25 (2.00; 2.75)            | 2 (1.75; 2.5)                       | 2.25 (2; 2.75)             |
| WPA                           | 2.86 (2.14; 3.57)            | 3 (2.29; 3.71)                      | 2.86 (2.14; 3.57)          |
| Sex (%male)                   | 47                           | 67                                  | 47                         |
| Smoke status                  |                              |                                     |                            |
| never                         | 26.9                         | 15                                  | 26.5                       |
| former                        | 42.2                         | 33.6                                | 41.9                       |
| current                       | 30.8                         | 51.33                               | 31.6                       |

Suppl. Table 2 - Population descriptives of the SHIP study participants who died of cancer. All values are given as median (25<sup>th</sup> and 75<sup>th</sup> percentile) or percentage for categorical variables. BMI: body mass index. VO<sub>2</sub>peak: peak oxygen consumption. VO<sub>2</sub>@AT: oxygen consumption at the aerobic threshold. LTPA: leisure time physical activity. SPA: sports-related physical activity. WPA: work-related physical activity.

| Parameter                     | Survivors only<br>(n = 2797) | Cancer mortality subgroup (n =<br>85) | All subjects<br>(n = 2882) |      |
|-------------------------------|------------------------------|---------------------------------------|----------------------------|------|
| Age (years)                   | 52 (40; 64)                  | 69 (60; 76)                           | 53 (41; 65)                |      |
| Income (€)                    | 1100 (778; 1525)             | 1096 (778; 1450)                      | 1100 (778; 1525)           |      |
| alcohol consumption (ml/day)  | 3.9 (1.02; 12.12)            | 3.45 (0.65; 11.50)                    | 3.93 (1.01; 12.12)         |      |
| School education, % <10 years | 36.2                         | 72.9                                  | 37.23                      |      |
| BMI (kg/m <sup>2</sup> )      | 27 (24; 31)                  | 29 (26; 32)                           | 27 (24; 31)                |      |
| VO <sub>2</sub> peak (ml/min) | 1900 (1526; 2395)            | 1654 (1436; 1900)                     | 1884 (1524; 2378)          |      |
| VO <sub>2</sub> @AT (ml/min)  | 1050 (900; 1300)             | 1000 (900; 1100)                      | 1050 (900; 1300)           |      |
| max. Watt                     | 148 (116; 180)               | 116 (100; 148)                        | 148 (116; 180)             |      |
| LTPA                          | 3.25 (2.75; 3.75)            | 3.25 (2.63; 3.63)                     | 3.25 (2.75; 3.75)          |      |
| SPA                           | 2.25 (2.00; 2.75)            | 2 (1.75; 2.5)                         | 2.25 (2; 2.75)             |      |
| WPA                           | 2.86 (2.14; 3.57)            | 3 (2.57; 3.29)                        | 2.86 (2.14; 3.57)          |      |
| Sex (%male)                   | 47                           | 72                                    | 47                         |      |
| Smoke status                  |                              |                                       |                            |      |
|                               | never                        | 26.6                                  | 23.5                       | 26.5 |
|                               | former                       | 42.3                                  | 27.1                       | 41.9 |
|                               | current                      | 31.1                                  | 49.4                       | 31.6 |

Suppl. Table 3 Characteristics of participants according to physical activity domain categories in SHIP-1. Q1-Q4: quartiles 1 to 4. Entries are median (25th, 75th percentile) or %. P-trend from Cuzick's non-parametric test. BMI: body mass index. VO<sub>2</sub>peak: peak oxygen consumption. VO<sub>2</sub>@AT: oxygen consumption at the aerobic threshold. LTPA: leisure time physical activity. SPA: sports-related physical activity. WPA: work-related physical activity.

|                               | Quartiles of the Baecke questionnaire indices |                      |                      |                      | P<br>(linear trend) |
|-------------------------------|-----------------------------------------------|----------------------|----------------------|----------------------|---------------------|
|                               | Q1                                            | Q2                   | Q3                   | Q4                   |                     |
| <b>LTPA (n = 2,911)</b>       |                                               |                      |                      |                      |                     |
| N (min – max)                 | 837 (1.0 - 2.8)                               | 854 (3.0 - 3.3)      | 781 (3.5 - 3.8)      | 439 (4.0 - 5.0)      |                     |
| Female, %                     | 50.4                                          | 50.0                 | 54.3                 | 57.4                 | 0.006               |
| Age, years                    | 52 (40, 66)                                   | 54 (42, 65)          | 54 (41, 64)          | 52 (40, 63)          | 0.126               |
| School education, % <10 years | 38.6                                          | 38.3                 | 37.8                 | 33.7                 | 0.087               |
| Income, €                     | 1,100 (778, 1472)                             | 1,100 (895, 1,472)   | 1,100 (894, 1,550)   | 1,140 (778, 1,525)   | 0.287               |
| Smoking status, %             |                                               |                      |                      |                      | 0.001               |
| Never                         | 36.1                                          | 41.6                 | 44.8                 | 46.9                 |                     |
| Former                        | 30.8                                          | 27.1                 | 23.8                 | 23.1                 |                     |
| Current                       | 33.1                                          | 31.3                 | 31.4                 | 30.1                 |                     |
| Alcohol consumption, gr/day   | 3.9 (0.7, 12.8)                               | 4.3 (1.3, 13.1)      | 3.9 (1.1, 11.2)      | 3.5 (1.1, 10.7)      | 0.723               |
| BMI, kg/m <sup>2</sup>        | 28.1 (24.7, 31.6)                             | 27.6 (24.5, 31.0)    | 27.1 (24.4, 30.1)    | 26.3 (23.7, 29.8)    | <0.001              |
| VO <sub>2</sub> peak (ml/min) | 1,850 (1,500, 2,350)                          | 1,858 (1,500, 2,409) | 1,900 (1,550, 2,400) | 1,906 (1,593, 2,328) | 0.154               |
| VO <sub>2</sub> @AT (ml/min)  | 1,000 (850, 1,250)                            | 1,050 (900, 1,250)   | 1,100 (900, 1,330)   | 1,100 (900, 1,300)   | 0.002               |
| max. Watt                     | 148 (116, 180)                                | 148 (116, 180)       | 148 (116, 196)       | 148 (116, 180)       | 0.020               |
| <b>SPA (n = 2,910)</b>        |                                               |                      |                      |                      |                     |
| n (min – max)                 | 1,150 (1.0 - 2.0)                             | 415 (2.2 - 2.3)      | 631 (2.5 – 2.8)      | 714 (3.0 – 5.0)      |                     |
| Female, %                     | 51.7                                          | 50.8                 | 58.5                 | 48.9                 | 0.958               |
| Age, years                    | 55 (42, 67)                                   | 53 (42, 64)          | 53 (40, 63)          | 51 (39, 63)          | <0.001              |
| School education, % <10 years | 46.3                                          | 39.0                 | 34.4                 | 25.4                 | <0.001              |

|                               |                      |                      |                      |                      |        |
|-------------------------------|----------------------|----------------------|----------------------|----------------------|--------|
| Income, €                     | 1,096 (778, 1,450)   | 1,100 (778, 1,472)   | 1,184 (895, 1,550)   | 1,450 (1,096, 1,760) | <0.001 |
| Smoking status, %             |                      |                      |                      |                      | <0.001 |
| Never                         | 38.9                 | 39.0                 | 45.0                 | 44.8                 |        |
| Former                        | 29.4                 | 30.6                 | 23.6                 | 22.8                 |        |
| Current                       | 31.7                 | 30.4                 | 31.4                 | 32.5                 |        |
| Alcohol consumption, gr/day   | 3.2 (0.7, 11.0)      | 4.0 (1.1, 13.4)      | 3.9 (1.2, 11.2)      | 5.2 (1.3, 13.5)      | <0.001 |
| BMI, kg/m <sup>2</sup>        | 28.0 (24.9, 31.6)    | 27.6 (24.8, 30.8)    | 27.4 (24.1, 30.9)    | 26.2 (23.7, 29.4)    | <0.001 |
| VO <sub>2</sub> peak (ml/min) | 1,750 (1,450, 2,207) | 1,954 (1,600, 2,328) | 1,815 (1,510, 2,296) | 2,050 (1,648, 2,600) | <0.001 |
| VO <sub>2</sub> @AT (ml/min)  | 1,000 (850, 1,200)   | 1,100 (900, 1,250)   | 1,050 (900, 1,300)   | 1,150 (950, 1,400)   | <0.001 |
| max. Watt                     | 132 (116, 180)       | 148 (132, 180)       | 148 (116, 180)       | 164 (132, 212)       | <0.001 |
| <b>WPA (n = 1,434)</b>        |                      |                      |                      |                      |        |
| n (min – max)                 | 365 (1 - 2.1)        | 424 (2.3 - 2.9)      | 355 (3.0 – 3.6)      | 290 (3.7 – 4.9)      |        |
| Female, %                     | 57.3                 | 55.7                 | 49.0                 | 48.3                 | 0.006  |
| Age, years                    | 44 (37, 52)          | 45 (38, 54)          | 44 (36, 52)          | 43 (35, 49)          | 0.008  |
| School education, % <10 years | 6.3                  | 10.9                 | 14.9                 | 23.1                 | <0.001 |
| Income, €                     | 1,550 (1,275, 1,900) | 1,472 (1,096, 1,803) | 1,183 (895, 1,525)   | 1,096 (778, 1,450)   | <0.001 |
| Smoking status, %             |                      |                      |                      |                      | <0.001 |
| Never                         | 43.3                 | 44.1                 | 38.3                 | 30.3                 |        |
| Former                        | 25.6                 | 27.4                 | 36.6                 | 43.8                 |        |
| Current                       | 27.1                 | 28.5                 | 25.1                 | 25.9                 |        |
| Alcohol consumption, gr/day   | 5.6 (2.0, 14.9)      | 6.7 (2.1, 15.7)      | 5.0 (1.3, 13.3)      | 5.4 (1.7, 14.3)      | 0.440  |
| BMI, kg/m <sup>2</sup>        | 26.0 (23.1, 29.1)    | 26.4 (23.3, 30.2)    | 26.1 (23.5, 29.5)    | 26.6 (24.1, 29.7)    | 0.198  |
| VO <sub>2</sub> peak (ml/min) | 2,049 (1,609, 2,500) | 2,017 (1,619, 2,598) | 2,128 (1,660, 2,542) | 2,100 (1,691, 2,609) | 0.261  |
| VO <sub>2</sub> @AT (ml/min)  | 1,100 (900, 1,300)   | 1,150 (950, 1,400)   | 1,100 (910, 1,335)   | 1,100 (950, 1,300)   | 0.707  |
| max. Watt                     | 164 (132, 196)       | 164 (132, 196)       | 164 (132, 212)       | 164 (132, 196)       | 0.697  |

Suppl. Table 4 - Population descriptives of the CARLA study participants who died of CVD. All values are given as median (25<sup>th</sup> and 75<sup>th</sup> percentile) or percentage for categorical variables. BMI: body mass index. VO<sub>2</sub>peak: peak oxygen consumption. VO<sub>2</sub>@AT: oxygen consumption at the aerobic threshold. LTPA: leisure time physical activity. SPA: sports-related physical activity. WPA: work-related physical activity.

| Parameter                     | Survivors only<br>(n = 1362) | CVD mortality subgroup<br>(n = 157) | All subjects<br>(n = 1519) |
|-------------------------------|------------------------------|-------------------------------------|----------------------------|
| Age (years)                   | 61.5 (54.0; 68.5)            | 77.1 (70.4; 79.6)                   | 62.6 (54.7; 70.5)          |
| Income (€)                    | 1750 (1250; 2250)            | 1750 (1250; 1750)                   | 1750 (1250; 2250)          |
| alcohol consumption (ml/day)  | 5.0 (0.0; 16.8)              | 2.7 (0.0; 13.8)                     | 5.0 (0.0; 16.2)            |
| School education, % <10 years | 34.2                         | 65.0                                | 37.35                      |
| BMI (kg/m <sup>2</sup> )      | 27.8 (25.0; 30.9)            | 27.9 (25.2; 31.6)                   | 27.8 (25.0; 31.0)          |
| LTPA                          | 3.3 (2.8; 3.5)               | 3.0 (2.5; 3.3)                      | 3.3 (2.8; 3.5)             |
| SPA                           | 2.3 (1.8; 3.0)               | 2.0 (1.5; 2.5)                      | 2.3 (1.8; 3.0)             |
| WPA                           | 2.6 (2.1; 3.4)               | 2.9 (2.5; 3.3)                      | 2.6 (2.1; 3.4)             |
| Sex (%male)                   | 49.8                         | 66.2                                | 51.5                       |
| Smoke status                  |                              |                                     |                            |
| never                         | 47.9                         | 38.8                                | 46.9                       |
| former                        | 32.6                         | 47.1                                | 34.1                       |
| current                       | 19.5                         | 14.0                                | 19.0                       |

Suppl. Table 5 - Population descriptives of the CARLA study participants who died of cancer. All values are given as median (25<sup>th</sup> and 75<sup>th</sup> percentile) or percentage for categorical variables. BMI: body mass index. VO<sub>2</sub>peak: peak oxygen consumption. VO<sub>2</sub>@AT: oxygen consumption at the aerobic threshold. LTPA: leisure time physical activity. SPA: sports-related physical activity. WPA: work-related physical activity.

| Parameter                     | Survivors only<br>(n = 1362) | Cancer mortality subgroup<br>(n = 136) | All subjects<br>(n = 1495) |
|-------------------------------|------------------------------|----------------------------------------|----------------------------|
| Age (years)                   | 61.5 (54.0; 68.5)            | 72.6 (65.4; 77.9)                      | 62.6 (54.5; 69.6)          |
| Income (€)                    | 1750 (1250; 2250)            | 1750 (1250; 2250)                      | 1750 (1250; 2250)          |
| alcohol consumption (ml/day)  | 5.0 (0.0; 16.8)              | 5.4 (0.0; 23.0)                        | 5.0 (0.0; 17.4)            |
| School education, % <10 years | 34.2                         | 61.3                                   | 36.56                      |
| BMI (kg/m <sup>2</sup> )      | 27.8 (25.0; 30.9)            | 28.4 (25.5; 30.9)                      | 27.8 (25.0; 30.9)          |
| LTPA                          | 3.3 (2.8; 3.5)               | 3.0 (2.5; 3.5)                         | 3.3 (2.8; 3.5)             |
| SPA                           | 2.3 (1.8; 3.0)               | 2.0 (1.8; 2.8)                         | 2.3 (1.8; 3.0)             |
| WPA                           | 2.6 (2.1; 3.4)               | 3.5 (2.3; 3.9)                         | 2.6 (2.1; 3.4)             |
| Sex (%male)                   | 49.8                         | 71.5                                   | 51.8                       |
| Smoke status                  |                              |                                        |                            |
| never                         | 47.9                         | 33.1                                   | 46.5                       |
| former                        | 32.6                         | 45.6                                   | 33.8                       |
| current                       | 19.5                         | 21.3                                   | 19.7                       |

Suppl. Table 6 Characteristics of participants according to physical activity domain categories in CARLA. Q1-Q4: quartiles 1 to 4. Entries are median (25th, 75th percentile) or %. P-trend from Cuzick's non-parametric test. BMI: body mass index. LTPA: leisure time physical activity. SPA: sports-related physical activity. WPA: work-related physical activity.

|                               | Quartiles of the Baecke questionnaire indices |                      |                      |                      | P<br>(linear trend) |
|-------------------------------|-----------------------------------------------|----------------------|----------------------|----------------------|---------------------|
|                               | Q1                                            | Q2                   | Q3                   | Q4                   |                     |
| <b>LTPA (N = 1,776)</b>       |                                               |                      |                      |                      |                     |
| N (min – max)                 | 346 (1.2-2.5)                                 | 484 (2.7-3.0)        | 555 (3.2-3.5)        | 391 (3.7-5.0)        |                     |
| Female, %                     | 42                                            | 45                   | 41                   | 33                   | <0.001              |
| Age, years                    | 65 (56, 75)                                   | 65 (56, 75)          | 64 (55, 74)          | 62 (55, 68)          | 0.13                |
| School education, % <10 years | 45                                            | 42                   | 37                   | 36                   | <0.001              |
| Income, €                     | 1,750 (1,250, 2,250)                          | 1,750 (1,250, 2,250) | 1,750 (1,250, 2,250) | 1,750 (1,250, 2,250) | <0.001              |
| Smoking status, %             |                                               |                      |                      |                      | <0.001              |
| Never                         | 35.8                                          | 50.2                 | 45.8                 | 44.8                 |                     |
| Former                        | 38.4                                          | 31.6                 | 36.9                 | 37.1                 |                     |
| Current                       | 25.7                                          | 18.2                 | 17.3                 | 18.2                 |                     |
| Alcohol consumption, gr/day   | 5.0 (0, 2.9)                                  | 5.0 (0, 18.9)        | 5.0 (0, 15.6)        | 5.0 (0, 16.2)        | <0.001              |
| BMI, kg/m <sup>2</sup>        | 29.0 (26.2, 32.5)                             | 27.9 (25.4, 30.8)    | 27.7 (25.0, 30.6)    | 27.1 (24.3, 30.1)    | 0.85                |
| <b>SPA (N =1,770)</b>         |                                               |                      |                      |                      |                     |
| n (min – max)                 | 508 (1.0-1.7)                                 | 473 (2-2.2)          | 334 (2.5-2.7)        | 455 (3.0-5.0)        |                     |
| Female, %                     | 46.85                                         | 42.49                | 45.21                | 47.91                | <0.001              |
| Age, years                    | 64.51 (54.48, 75.14)                          | 63.55 (54.94, 73.03) | 64.3 (57.69, 72.32)  | 64.29 (56.36, 70.38) | <0.001              |
| School education, % <10 years | 45.47                                         | 41.53                | 37.43                | 36.48                | <0.001              |
| Income, €                     | 1,750 (1,250, 2,250)                          | 1,750 (1,250, 2,250) | 1,750 (1,250, 2,250) | 1,750 (1,250, 2,250) | <0.001              |
| Smoking status, %             |                                               |                      |                      |                      | <0.001              |
| Never                         | 41.9                                          | 40.6                 | 47.6                 | 50.5                 |                     |



|                               |                      |                      |                      |                      |        |
|-------------------------------|----------------------|----------------------|----------------------|----------------------|--------|
| Former                        | 33.7                 | 35.9                 | 39.8                 | 35.6                 |        |
| Current                       | 24.4                 | 23.5                 | 12.6                 | 13.8                 |        |
| Alcohol consumption, gr/day   | 2.7 (0.0, 16.5)      | 5.0 (0.0, 16.2)      | 5.0 (0, 16.2)        | 7.4 (0.0, 18.9)      | <0.001 |
| BMI, kg/m <sup>2</sup>        | 27.7 (25.0, 31.0)    | 28.0 (25.5, 31.1)    | 28.1 (25.4, 31.4)    | 27.7 (24.7, 30.1)    | <0.001 |
| <b>WPA (N =392)</b>           |                      |                      |                      |                      |        |
| n (min – max)                 | 88 (1.2-2.0)         | 96 (2.1-2.5)         | 108 (2.6-3.2)        | 100 (3.4-4.5)        |        |
| Female, %                     | 53.41                | 38.54                | 37.96                | 25.00                | <0.001 |
| Age, years                    | 52.97 (50.67, 57.87) | 53.64 (50.18, 57.15) | 53.44 (51.16, 56.53) | 53.41 (49.25, 56.54) | 0.28   |
| School education, % <10 years | 9.09                 | 5.21                 | 9.26                 | 9.00                 | 0.63   |
| Income, €                     | 2,750 (1,750, 3,250) | 2,750 (2,250, 3,250) | 2,250 (1,750, 2,750) | 2,250 (1,750, 2,750) | <0.001 |
| Smoking status, %             |                      |                      |                      |                      | <0.001 |
| Never                         | 46.6                 | 50.0                 | 36.1                 | 32.0                 |        |
| Former                        | 28.4                 | 32.3                 | 31.5                 | 35.0                 |        |
| Current                       | 25.0                 | 17.7                 | 32.4                 | 33.0                 |        |
| Alcohol consumption, gr/day   | 4.7 (0.0, 13.4)      | 7.6 (2.5, 22.4)      | 10.8 (2.8, 24.5)     | 13.3 (4.5, 29.6)     | <0.001 |
| BMI, kg/m <sup>2</sup>        | 27.7 (25.0, 31.1)    | 28.0 (25.4, 31.1)    | 28.1 (25.4, 31.4)    | 27.7 (24.7, 30.1)    | 0.67   |

Suppl. Table 7 Hazards ratios for the association between physical activity domains with all-cause and cause-specific mortality in SHIP participants who also completed the CPET. PY: person years. CI: confidence interval. CVD: cardiovascular disease. LTPA: leisure time physical activity. SPA: sports related physical activity. WPA: work related physical activity. CVD mortality was defined as ICD-10: I10-I79, R96. Cancer mortality was defined as ICD-10: C00-C97.

|      | all-cause          |                        |                        | CVD mortality      |                        |                        | Cancer mortality   |                        |                                      |
|------|--------------------|------------------------|------------------------|--------------------|------------------------|------------------------|--------------------|------------------------|--------------------------------------|
|      | cases/person years | incidence per 10000 PY | HR (95% CI)            | cases/person years | incidence per 10000 PY | HR (95% CI)            | cases/person years | incidence per 10000 PY | HR (95% CI)                          |
| LTPA | 80/12416           | 64                     | 0.91<br>(0.72 to 1.17) | 18/12416           | 14                     | 0.76<br>(0.44 to 1.27) | 30/12357           | 24                     | 1.02<br>(0.68 to 1.52)               |
| SPA  | 80/12349           | 65                     | 0.94<br>(0.75 to 1.18) | 18/12349           | 15                     | 1.01<br>(0.63 to 1.62) | 30/12349           | 24                     | <b>0.65</b><br><b>(0.43 to 0.99)</b> |
| WPA  | 20/6975            | 29                     | 0.83<br>(0.50 to 1.38) | 4/6975             | 6                      | 0.99<br>(0.27 to 3.76) | 7/6974             | 10                     | 0.62<br>(0.28 to 1.37)               |
